# Supplementary material for: Transition metal (Rh and Fe) complexes and main-group (Se and B) adducts with N,N′-diphosphanyl NHC ligands: a study of stereoelectronic properties
Source: Royal Society of Chemistry journal article supplement (doi:10.1039/c6dt00318d), 2016-01-01
Supplement: c6dt00318d1.pdf [file c6dt00318d1.pdf]

ESI

**Transition metal (Rh and Fe) complexes and main-group (Se and B) adducts with *N,N'*-Diphosphanyl NHC Ligands: a study of stereoelectronic properties<sup>†</sup>**

Pengfei Ai,<sup>a</sup> Andreas A. Danopoulos,<sup>\*a,b</sup> and Pierre Braunstein<sup>\*a</sup>

<sup>a</sup> Laboratoire de Chimie de Coordination, Institut de Chimie (UMR 7177 CNRS), Université de Strasbourg, 4 rue Blaise Pascal, 67081 Strasbourg Cedex, France. E-mail: danopoulos@unistra.fr, braunstein@unistra.fr

<sup>b</sup> Institute for Advanced Study, USIAS, Université de Strasbourg, France.

**Contents:**

|                |   |
|----------------|---|
| Table S1 ..... | 2 |
|----------------|---|

**Table S1.** Crystal data for compounds **PC<sub>NHC</sub>P-RhCl•2CH<sub>2</sub>Cl<sub>2</sub>**, **PC<sub>NHC</sub>P-RhCO**, **PC<sub>NHC</sub>P-Fe**, **PC<sub>NHC</sub>P-Se**, **PC<sub>NHC</sub>P-B-1•THF** and **PC<sub>NHC</sub>P-B-2•toluene**.

|                                                                                        | <b>PC<sub>NHC</sub>P-RhCl•2CH<sub>2</sub>Cl<sub>2</sub></b>                                         | <b>PC<sub>NHC</sub>P-RhCO</b>                                                                | <b>PC<sub>NHC</sub>P-Fe</b>                                                                                  | <b>PC<sub>NHC</sub>P-Se</b>                                                   | <b>PC<sub>NHC</sub>P-B-1•THF</b>                                                                                | <b>PC<sub>NHC</sub>P-B-2•toluene</b>                                                                                                       |
|----------------------------------------------------------------------------------------|-----------------------------------------------------------------------------------------------------|----------------------------------------------------------------------------------------------|--------------------------------------------------------------------------------------------------------------|-------------------------------------------------------------------------------|-----------------------------------------------------------------------------------------------------------------|--------------------------------------------------------------------------------------------------------------------------------------------|
| Chemical formula                                                                       | C <sub>38</sub> H <sub>76</sub> ClN <sub>4</sub> P <sub>4</sub> Rh•2CH <sub>2</sub> Cl <sub>2</sub> | C <sub>24</sub> H <sub>40</sub> N <sub>4</sub> O <sub>2</sub> P <sub>2</sub> Rh <sub>2</sub> | C <sub>46</sub> H <sub>92</sub> Cl <sub>6</sub> Fe <sub>3</sub> N <sub>4</sub> O <sub>2</sub> P <sub>4</sub> | C <sub>19</sub> H <sub>38</sub> N <sub>2</sub> P <sub>2</sub> Se <sub>2</sub> | C <sub>37</sub> H <sub>38</sub> BF <sub>15</sub> N <sub>2</sub> P <sub>2</sub> •C <sub>4</sub> H <sub>8</sub> O | C <sub>37</sub> H <sub>38</sub> B <sub>3</sub> F <sub>15</sub> N <sub>2</sub> O <sub>3</sub> P <sub>2</sub> •C <sub>7</sub> H <sub>8</sub> |
| CCDC Number                                                                            | 1449235                                                                                             | 1449237                                                                                      | 1449234                                                                                                      | 1449238                                                                       | 1449239                                                                                                         | 1449236                                                                                                                                    |
| Formula Mass                                                                           | 1021.12                                                                                             | 684.36                                                                                       | 1237.36                                                                                                      | 435.41                                                                        | 940.55                                                                                                          | 1030.20                                                                                                                                    |
| Crystal system                                                                         | Triclinic                                                                                           | Orthorhombic                                                                                 | Trigonal                                                                                                     | Orthorhombic                                                                  | Monoclinic                                                                                                      | Monoclinic                                                                                                                                 |
| <i>a</i> /Å                                                                            | 14.6459(12)                                                                                         | 15.9082(5)                                                                                   | 23.440(3)                                                                                                    | 14.2413(17)                                                                   | 12.3210(5)                                                                                                      | 11.9249(6)                                                                                                                                 |
| <i>b</i> /Å                                                                            | 15.1086(13)                                                                                         | 14.5038(3)                                                                                   | 23.440(3)                                                                                                    | 9.0598(11)                                                                    | 22.2071(10)                                                                                                     | 36.9050(17)                                                                                                                                |
| <i>c</i> /Å                                                                            | 15.8170(13)                                                                                         | 25.3341(9)                                                                                   | 32.519(5)                                                                                                    | 17.831(2)                                                                     | 16.3727(7)                                                                                                      | 13.6692(7)                                                                                                                                 |
| <i>α</i> /°                                                                            | 88.107(2)                                                                                           | 90                                                                                           | 90                                                                                                           | 90                                                                            | 90                                                                                                              | 90                                                                                                                                         |
| <i>β</i> /°                                                                            | 64.451(2)                                                                                           | 90                                                                                           | 90                                                                                                           | 90                                                                            | 105.5780(10)                                                                                                    | 102.6380(10)                                                                                                                               |
| <i>γ</i> /°                                                                            | 72.376(2)                                                                                           | 90                                                                                           | 120                                                                                                          | 90                                                                            | 90                                                                                                              | 90                                                                                                                                         |
| Unit cell volume/Å <sup>3</sup>                                                        | 2990.1(4)                                                                                           | 5845.3(3)                                                                                    | 15473(5)                                                                                                     | 2300.6(5)                                                                     | 4315.2(3)                                                                                                       | 5869.9(5)                                                                                                                                  |
| Temperature/K                                                                          | 173(2)                                                                                              | 173(2)                                                                                       | 173(2)                                                                                                       | 173(2)                                                                        | 173(2)                                                                                                          | 173(2)                                                                                                                                     |
| Space group                                                                            | <i>P</i> -1                                                                                         | <i>Pbca</i>                                                                                  | <i>R</i> -3: <i>H</i>                                                                                        | <i>Cmc</i> 21                                                                 | <i>P</i> 21/ <i>c</i>                                                                                           | <i>P</i> 21/ <i>c</i>                                                                                                                      |
| Formula units / cell, <i>Z</i>                                                         | 2                                                                                                   | 8                                                                                            | 9                                                                                                            | 4                                                                             | 4                                                                                                               | 4                                                                                                                                          |
| Absorption coefficient, <i>μ</i> /mm <sup>-1</sup>                                     | 0.643                                                                                               | 1.265                                                                                        | 0.983                                                                                                        | 1.775                                                                         | 0.201                                                                                                           | 0.156                                                                                                                                      |
| No. of reflections measured                                                            | 40535                                                                                               | 34869                                                                                        | 59437                                                                                                        | 5810                                                                          | 41879                                                                                                           | 58026                                                                                                                                      |
| No. of independent reflections                                                         | 14544                                                                                               | 6627                                                                                         | 8314                                                                                                         | 2220                                                                          | 10387                                                                                                           | 14178                                                                                                                                      |
| <i>R</i> <sub>int</sub>                                                                | 0.0477                                                                                              | 0.1222                                                                                       | 0.2125                                                                                                       | 0.0407                                                                        | 0.0453                                                                                                          | 0.0427                                                                                                                                     |
| Final <i>R</i> <sub>I</sub> values ( <i>I</i> > 2 <i>σ</i> ( <i>I</i> ))               | 0.0699                                                                                              | 0.1022                                                                                       | 0.0897                                                                                                       | 0.0499                                                                        | 0.0499                                                                                                          | 0.0748                                                                                                                                     |
| Final <i>wR</i> ( <i>F</i> <sup>2</sup> ) values ( <i>I</i> > 2 <i>σ</i> ( <i>I</i> )) | 0.1933                                                                                              | 0.1914                                                                                       | 0.1603                                                                                                       | 0.1166                                                                        | 0.1028                                                                                                          | 0.1998                                                                                                                                     |
| Final <i>R</i> <sub>I</sub> values (all data)                                          | 0.1111                                                                                              | 0.1534                                                                                       | 0.1912                                                                                                       | 0.0707                                                                        | 0.0870                                                                                                          | 0.1126                                                                                                                                     |
| Final <i>wR</i> ( <i>F</i> <sup>2</sup> ) values (all data)                            | 0.2111                                                                                              | 0.2130                                                                                       | 0.1960                                                                                                       | 0.1285                                                                        | 0.1179                                                                                                          | 0.2152                                                                                                                                     |
| Goodness of fit on <i>F</i> <sup>2</sup>                                               | 1.060                                                                                               | 1.289                                                                                        | 1.016                                                                                                        | 1.030                                                                         | 1.019                                                                                                           | 1.050                                                                                                                                      |

The following special comments apply to the models of the structures:

For **PC<sub>NHC</sub>P-RhCl**•2CH<sub>2</sub>Cl<sub>2</sub>, the asymmetric unit contains two half a molecule of the rhodium compound, one chloride and two molecules of CH<sub>2</sub>Cl<sub>2</sub>. The rhodium atoms are in special positions. A squeeze was used to eliminate residual density and this corresponds to one disordered molecule of pentane.

For **PC<sub>NHC</sub>P-Fe**, the atom Fe2 is in special position (population 50%). The carbons C9, C10, C11 are disordered on two positions. A squeeze was made. The residual electron density was assigned to half a molecule of THF.

For **PC<sub>NHC</sub>P-Se**, the atoms C1, C2, C3, N1, N2, P1, P2 and Se1 are in a special position (population 50%).

For **PC<sub>NHC</sub>P-B-2**•toluene, the carbons C9, C10 and C11 are disordered on two positions. A squeeze was made. The residual electron density was assigned to two molecules of toluene.
